# Supplementary material
Source: PubMed Central journal article supplement (PMC3675949)
Supplement: AEM.00591-13_zam999104433so1.pdf [file AEM.00591-13_zam999104433so1.pdf]

**Table S1***Bacillus* strains used in this study whose genome sequences are available from GenBank.

| Species and strain            | H-antigen | Description                                      | Accession no. of genome           |
|-------------------------------|-----------|--------------------------------------------------|-----------------------------------|
| <i>Bacillus anthracis</i>     |           |                                                  |                                   |
| A0174                         | -         | Animal, cattle (bovine) [pXO1+/pXO2-]            | <a href="#">NZ_ABLT01000000</a>   |
| A0193                         | -         | Animal, cattle (cow) [pXO1+/pXO2+]               | <a href="#">NZ_ABKF01000000</a>   |
| A0389                         | -         | [pXO1+/pXO2+]                                    | <a href="#">NZ_ABLB00000000</a>   |
| A0442                         | -         | Animal, Kudu [pXO1+/pXO2+]                       | <a href="#">NZ_ABKG01000000</a>   |
| A0465                         | -         | Animal, cattle (Cow), spleen [pXO1+/pXO2+]       | <a href="#">NZ_ABLH01000000</a>   |
| A0488                         | -         | Animal, cattle (cow)                             | <a href="#">NZ_ABJC01000000</a>   |
| A1055                         | -         | [pXO1-/pXO2+]                                    | <a href="#">NZ_AAEO01000000</a>   |
| A0248                         | -         | Human                                            | <a href="#">CP001598.1</a>        |
| Ames                          | -         | [pXO1-/pXO2-]                                    | <a href="#">AE016879.1</a>        |
| Ames Ancestor                 | -         | Animal, cattle (Cow)                             | <a href="#">AE017334.2</a>        |
| Australia-94                  | -         | Animal, cattle (Bovine) [pXO1+/pXO2+]            | <a href="#">NZ_AAES00000000</a>   |
| BF1                           | -         | Animal, cow carcass [pXO1+/pXO2+]                | <a href="#">AMDT01000000</a>      |
| CDC 684                       | -         | [pXO1+/pXO2+]                                    | <a href="#">CP001215.1</a>        |
| CNEVA-9066                    | -         | Human [pXO1+/pXO2+]                              | <a href="#">NZ_AAEN01000000</a>   |
| H9401                         | -         | Human [pXO1+/pXO2+]                              | <a href="#">NC_017729.1</a>       |
| Kruger-B                      | -         | [pXO1+/pXO2+]                                    | <a href="#">NZ_AAEQ01000000</a>   |
| Sterne                        | -         | Animal, cattle (cow)                             | <a href="#">AE017225.1</a>        |
| Tsiankovskii-I                | -         | [pXO1+/pXO2+]                                    | <a href="#">NZ_ABDN00000000</a>   |
| UR-1                          | -         | [pXO1+/pXO2+]                                    | <a href="#">ALNY00000000</a>      |
| Vollum                        | -         | [pXO1+/pXO2+]                                    | <a href="#">NZ_AAEP01000000</a>   |
| Western-North-America-USA6153 | -         | Animal, Bison [pXO1+/pXO2+]                      | <a href="#">NZ_AAER01000000</a>   |
| <i>Bacillus cereus</i>        |           |                                                  |                                   |
| 03BB102                       | -         | Human, blood                                     | <a href="#">CP001407.1</a>        |
| 03BB108                       | -         | Dust in clinical case workspace                  | <a href="#">NZ_ABDM02000020.1</a> |
| 172560 W                      | -         | Human, burn wound                                | <a href="#">NZ_ACLV01000026.1</a> |
| 95/8201                       | -         | Human, endocarditis                              | <a href="#">NZ_ACMF01000000.1</a> |
| AH1134                        | -         | Human, eye [pediatric<br>Endophthalmitis case]   | <a href="#">NZ_ABDA02000001.1</a> |
| AH1271                        | -         | Human                                            | <a href="#">NZ_ACMR01000046.1</a> |
| AH1272                        | -         | Human, amniotic fluid                            | <a href="#">NZ_ACMS01000052.1</a> |
| AH1273                        | -         | Human, blood                                     | <a href="#">NZ_ACMT01000058.1</a> |
| AH603                         | -         | Other, secretary lamp                            | <a href="#">NZ_ACMP01000032.1</a> |
| AH621                         | -         | Soil, heather soil                               | <a href="#">NZ_ACLX01000032.1</a> |
| AH187                         | -         | Human, vomit [emetic food poisoning<br>outbreak] | <a href="#">CP001177.1</a>        |
| AH676                         | -         | Soil, heather soil                               | <a href="#">NZ_ACMQ01000028.1</a> |
| AH820                         | -         | Human, periodontitis                             | <a href="#">CP001283.1</a>        |
| AND1407                       | -         | Food [emetic toxin/cereulide]                    | <a href="#">AHCM01000000</a>      |
| ATCC 10876                    | -         | Other, contaminated flask                        | <a href="#">NZ_ACLT01000025.1</a> |
| ATCC10987                     | -         | Dairy products, Cheese                           | <a href="#">AE017194.1</a>        |

---

|                          |   |                                                                                                 |                                   |
|--------------------------|---|-------------------------------------------------------------------------------------------------|-----------------------------------|
| ATCC 14579               | - | Other, Farm, cowshed air                                                                        | <a href="#">AE016877.1</a>        |
| ATCC4342                 | - | Dairy products, milk                                                                            | <a href="#">NZ_ACLZ01000016.1</a> |
| B4264                    | - | pleural fluid [human fatal]                                                                     | <a href="#">CP001176.1</a>        |
| BAG1X1-2                 | - | Soil                                                                                            | <a href="#">AHCR01000000</a>      |
| BAG1X1-3                 | - | Soil                                                                                            | <a href="#">AHCS01000000</a>      |
| BAG2X1-2                 | - | Soil                                                                                            | <a href="#">AHDA01000000</a>      |
| BAG3O-2                  | - | Soil                                                                                            | <a href="#">AHDC01000000</a>      |
| BAG3X2-1                 | - | Soil                                                                                            | <a href="#">AHDD01000000</a>      |
| BAG3X2-2                 | - | Soil                                                                                            | <a href="#">AHDE01000000</a>      |
| BAG4O-1                  | - | Soil                                                                                            | <a href="#">AHDF01000000</a>      |
| BAG4X12-1                | - | Soil                                                                                            | <a href="#">AHDG01000000</a>      |
| BAG5X1-1                 | - | Soil                                                                                            | <a href="#">AHDJ01000000</a>      |
| BAG6X1-1                 | - | Soil                                                                                            | <a href="#">AHDO01000000</a>      |
| BAG6X1-2                 | - | Soil                                                                                            | <a href="#">AHDP01000000</a>      |
| BDRD-Cer4                | - | BDRD                                                                                            | <a href="#">NZ_ACME01000017.1</a> |
| BDRD-ST196               | - | BDRD                                                                                            | <a href="#">NZ_ACMD01000044.1</a> |
| BDRD-ST24                | - | BDRD                                                                                            | <a href="#">NZ_ACMB01000021.1</a> |
| BDRD-ST26                | - | BDRD                                                                                            | <a href="#">NZ_ACMC01000026.1</a> |
| BGSC 6E1                 | - | [produces chitinase]                                                                            | <a href="#">NZ_ACLU00000000</a>   |
| biovar anthracis str. CI | - | Chimpanzee [clinical symptoms of anthrax]                                                       | <a href="#">NC_014335.1</a>       |
| CER057                   | - | Food [emetic toxin/cereulide]                                                                   | <a href="#">AHDS01000000</a>      |
| CER074                   | - | Food [emetic toxin/cereulide]                                                                   | <a href="#">AHDT01000000</a>      |
| E33L                     | - | Animal, Carcass of dead zebra                                                                   | <a href="#">CP000001.1</a>        |
| F65185                   | - | Human, wound                                                                                    | <a href="#">NZ_ACMO01000018.1</a> |
| F837/76                  | - | Human, wound [efficient diarrheal enterotoxin producer from prostate operation wound infection] | <a href="#">NC_016779.1</a>       |
| FRI-35                   | - | -                                                                                               | <a href="#">NC_018491.1</a>       |
| G9241                    | - | Human, sputum and blood                                                                         | <a href="#">NZ_AAEK01000002.1</a> |
| G9842                    | - | Human [human diarrhea]                                                                          | <a href="#">CP001186.1</a>        |
| H3081.97                 | - | Food [emetic toxin/cereulide]                                                                   | <a href="#">NZ_ABDL02000007.1</a> |
| HuA2-1                   | - | Soil                                                                                            | <a href="#">AHDV01000000</a>      |
| HuA2-4                   | - | Soil                                                                                            | <a href="#">AHDX01000000</a>      |
| HuA4-10                  | - | Soil                                                                                            | <a href="#">AHEA01000000</a>      |
| HuB1-1                   | - | Soil                                                                                            | <a href="#">AHEB01000000</a>      |
| IS075                    | - | Animal, mammal                                                                                  | <a href="#">AHCH01000000</a>      |
| ISP3191                  | - | Food (spice)                                                                                    | <a href="#">AHEK01000000</a>      |
| LCT-BC244                | - | -                                                                                               | <a href="#">AJGQ01000000</a>      |
| m1293                    | - | Dairy products, cream cheese                                                                    | <a href="#">NZ_ACLS01000032.1</a> |
| m1550                    | - | Food, uncooked chicken                                                                          | <a href="#">NZ_ACMA01000019.1</a> |
| MM3                      | - | Food                                                                                            | <a href="#">NZ_ACLW01000031.1</a> |
| MSX-A1                   | - | Air                                                                                             | <a href="#">AHEO01000000</a>      |
| MSX-A12                  | - | Human                                                                                           | <a href="#">AHEP01000000</a>      |
| MSX-D12                  | - | Air                                                                                             | <a href="#">AHEQ01000000</a>      |

---

|                               |      |                                                                                 |                                   |
|-------------------------------|------|---------------------------------------------------------------------------------|-----------------------------------|
| NC7401                        | -    | Human, faeces/stools or vomit [human vomiting, emetic toxin/cereulide producer] | <a href="#">NC_016771.1</a>       |
| NVH0391-98                    | -    | Food, Vegetable puree [diarrheal food poisoning outbreak, fatal]                | <a href="#">CP000764.1</a>        |
| Q1                            | -    | deepsurface oil reservoir                                                       | <a href="#">NC_011969</a>         |
| R309803                       | -    | Human, blood [human septicemia]                                                 | <a href="#">NZ_ACLY01000022.1</a> |
| Rock1-15                      | -    | Soil                                                                            | <a href="#">NZ_ACMH01000022.1</a> |
| Rock3-42                      | -    | Soil                                                                            | <a href="#">NZ_ADFM01000097.1</a> |
| W                             | -    | Soil                                                                            | <a href="#">NZ_ABCZ02000009.1</a> |
| VD014                         | -    | Soil                                                                            | <a href="#">AHER01000000</a>      |
| VD022                         | -    | Water                                                                           | <a href="#">AHCK01000000</a>      |
| VD045                         | -    | Soil                                                                            | <a href="#">AHET01000000</a>      |
| VD048                         | -    | Soil                                                                            | <a href="#">AHEU01000000</a>      |
| VD078                         | -    | Soil                                                                            | <a href="#">AHEV01000000</a>      |
| VD102                         | -    | Soil                                                                            | <a href="#">AHEW01000000</a>      |
| VD107                         | -    | Soil                                                                            | <a href="#">AHEX01000000</a>      |
| VD142                         | -    | Soil                                                                            | <a href="#">AHCL01000000</a>      |
| VD154                         | -    | Soil                                                                            | <a href="#">AHFG01000000</a>      |
| VD156                         | -    | Soil                                                                            | <a href="#">AHFH01000000</a>      |
| VD166                         | -    | Soil                                                                            | <a href="#">AHFI01000000</a>      |
| VD169                         | -    | Soil                                                                            | <a href="#">AHFJ01000000</a>      |
| VD200                         | -    | Water                                                                           | <a href="#">AHFM01000000</a>      |
| <i>Bacillus thuringiensis</i> |      |                                                                                 |                                   |
| 97-27                         | 34   | Human, tissue necrosis                                                          | <a href="#">AE017355.1</a>        |
| Al Hakam                      | H-   | Suspected bioweapons facility                                                   | <a href="#">CP000485.1</a>        |
| ATCC 10792                    | 1    | Animal, Insect                                                                  | <a href="#">NZ_ACNF01000027.1</a> |
| ATCC 35646                    | 14   | Other, sewage                                                                   | <a href="#">NZ_AAJM01000044.1</a> |
| BGSC 4AJ1                     | 28ab | Isolated in Mexico                                                              | <a href="#">NZ_ACNE00000000</a>   |
| BGSC 4AW1                     | 37   | Isolated in Spain                                                               | <a href="#">NZ_ACNG01000000</a>   |
| BGSC 4BA1                     | 20ac | Soil, Isolated in India                                                         | <a href="#">NZ_ACNH00000000</a>   |
| BGSC 4BD1                     | 40   | Isolated in China                                                               | <a href="#">NZ_ACNI00000000</a>   |
| BGSC 4CC1                     | 65   | Grain field, Isolated in Pakistan                                               | <a href="#">NZ_ACNJ01000021.1</a> |
| BGSC 4Y1                      | 19   | Isolated in Japan from soil                                                     | <a href="#">NZ_ACMY01000000</a>   |
| BMB171                        | H-   | -                                                                               | <a href="#">NC_014171.1</a>       |
| Bt4Q7                         | 14   | Plasmidless mutant                                                              | <a href="#">NZ_ACMZ01000025.1</a> |
| CT43                          | H-   | -                                                                               | <a href="#">CP001907</a>          |
| HD-771                        | H4ab | -                                                                               | <a href="#">NC_018500.1</a>       |
| HD73                          | -    | -                                                                               | <a href="#">CP004069.1</a>        |
| HD-789                        | -    | -                                                                               | <a href="#">NC_018508.1</a>       |
| IBL 200                       | H-   | Human [israelensis-like serovar]                                                | <a href="#">NZ_ACNK00000000</a>   |
| IBL 4222                      | H-   | Animal, cat [israelensis-like serovar]                                          | <a href="#">NZ_ACNL00000000</a>   |
| T01001                        | 1    | Animal, Insect, Isolated in Canada                                              | <a href="#">NZ_ACNA00000000</a>   |
| T03a001                       | 3abc | Animal, Insect, Isolated in the US                                              | <a href="#">NZ_ACND00000000</a>   |
| T04001                        | 4ab  | Isolated in the US                                                              | <a href="#">NZ_ACNB00000000</a>   |

---

|        |    |                                      |                        |
|--------|----|--------------------------------------|------------------------|
| T13001 | 13 | Animal, Insect, Isolated in Pakistan | <u>NZ_ACNC01000000</u> |
| YBT020 | 2  | Isolated by our team                 | <u>CP002508</u>        |

---
