# Supplementary material
Source: PubMed Central journal article supplement (PMC3675949)
Supplement: AEM.00591-13_zam999104433so2.pdf [file AEM.00591-13_zam999104433so2.pdf]

**Table S2**  
***Bacillus thuringiensis* strains used in this study**

| Species and strain | Serovar               | H-antigen | Description                                           | GenBank accession no. of <i>csaB</i> gene |
|--------------------|-----------------------|-----------|-------------------------------------------------------|-------------------------------------------|
| BGSC 4B2           | <i>finitimus</i>      | 2         | Animal, Insect, Isolated in the US                    | <a href="#">JF330333</a>                  |
| BGSC 4D11          | <i>kurstaki</i>       | 3abc      | - <sup>a</sup>                                        | <a href="#">JF411015</a>                  |
| HD-1               | <i>kurstaki</i>       | 3abc      | Isolated in the US                                    | <a href="#">JF411014</a>                  |
| YBT-1520           | <i>kurstaki</i>       | 3abc      | Isolated by our team                                  | <a href="#">JF330334</a>                  |
| BGSC 4C3           | <i>alesti</i>         | 3ac       | Animal, Insect, silkworm, Isolated in France          | <a href="#">JF330335</a>                  |
| BGSC 4AO1          | <i>sumiyoshiensis</i> | 3ad       | Isolated in Japan                                     | <a href="#">JF330336</a>                  |
| BGSC 4AP1          | <i>fukuokaensis</i>   | 3ade      | Isolated from soils of Japan                          | <a href="#">JF330337</a>                  |
| BGSC 4F1           | <i>kenyae</i>         | 4ac       | Animal, Insect, Isolated in England                   | <a href="#">JF330338</a>                  |
| 4G1                | <i>galleriae</i>      | 5ab       | Animal, Insect, Isolated in the USSR                  | <a href="#">JF330339</a>                  |
| BGSC 4H2           | <i>canadensis</i>     | 5ac       | Animal, Insect, Isolated in Canada                    | <a href="#">JF330393</a>                  |
| BGSC 4I4           | <i>entomocidus</i>    | 6         | Animal, Insect, Isolated in Canada                    | <a href="#">JF330340</a>                  |
| T07001             | <i>aizawai</i>        | 7         | Animal, insect, Isolated in Japan                     | <a href="#">JF330322</a>                  |
| BGSC 4K1           | <i>morrisoni</i>      | 8ab       | Isolated in USA                                       | <a href="#">JX162610</a>                  |
| BGSC 4Z1           | <i>ostrinae</i>       | 8ac       | Isolated in China                                     | <a href="#">JF330341</a>                  |
| BGSC 4AZ1          | <i>nigeriensis</i>    | 8bd       | Isolated in the USSR from soil                        | <a href="#">JF330342</a>                  |
| BGSC 4L1           | <i>tolworthi</i>      | 9         | Animal, Insect, Isolated in England                   | <a href="#">JF330343</a>                  |
| BGSC 4M1           | <i>darmstadiensis</i> | 10ab      | Isolated in England                                   | <a href="#">JF330344</a>                  |
| BGSC 4BF1          | <i>londrina</i>       | 10ac      | Soil, Isolated in Germany                             | <a href="#">JF330345</a>                  |
| BGSC 4N1           | <i>toumanoffi</i>     | 11ab      | Animal, Insect, Greater Wax Moth                      | <a href="#">JX162612</a>                  |
| BGSC 4U1           | <i>kyushuensis</i>    | 11ac      | Animal, insect, silkworm                              | <a href="#">JX162616</a>                  |
| BGSC 4O1           | <i>thompsoni</i>      | 12        | Animal, insect                                        | <a href="#">JF330346</a>                  |
| BGSC 4R1           | <i>dakota</i>         | 15        | Soil                                                  | <a href="#">JF330348</a>                  |
| BGSC 4S3           | <i>indiana</i>        | 16        | Soil, Isolated in the US                              | <a href="#">JF330349</a>                  |
| BGSC 4V1           | <i>tohokuensis</i>    | 17        | Animal, insect, Isolated in Japan                     | <a href="#">JF330350</a>                  |
| BGSC 4W1           | <i>kumamotoensis</i>  | 18ab      | Animal, Insect, Isolated in Japan                     | <a href="#">JF330351</a> □                |
| BGSC 4CA1          | <i>yosoo</i>          | 18ac      | Isolated in South Korea                               | <a href="#">JF330352</a>                  |
| BGSC 4AM1          | <i>yunnanensis</i>    | 20ab      | Animal, Insect, Isolated in China                     | <a href="#">JF330354</a>                  |
| BGSC 4X1           | <i>colmeri</i>        | 21        | Grain silo                                            | <a href="#">JF330355</a>                  |
| BGSC 4AN1          | <i>shanongiensis</i>  | 22        | Isolated in China                                     | <a href="#">JF330356</a>                  |
| BGSC 4AT1          | <i>japonensis</i>     | 23        | Isolated in Japan                                     | <a href="#">JF330357</a>                  |
| BGSC 4BE1          | <i>neoleonensis</i>   | 24ab      | Soil, Isolated in Mexico                              | <a href="#">JF330358</a>                  |
| BGSC 4AX1          | <i>novosibirsk</i>    | 24ac      | Soil                                                  | <a href="#">JX162615</a>                  |
| BGSC 4AL1          | <i>coreanensis</i>    | 25        | Isolated in South Korea                               | <a href="#">JF330359</a>                  |
| BGSC 4AG1          | <i>silo</i>           | 26        | Grain silo dust, Isolated in France                   | <a href="#">JF330394</a>                  |
| BGSC 4AC1          | <i>mexicanensis</i>   | 27        | -                                                     | <a href="#">JX162618</a>                  |
| BGSC 4CF1          | <i>jegathesan</i>     | 28ac      | Soil, Isolated in Malaysia                            | <a href="#">JF330360</a>                  |
| BGSC 4AE1          | <i>amagiensis</i>     | 29        | Animal, Insect, Isolated in Japan                     | <a href="#">JF330361</a>                  |
| BGSC 4AD1          | <i>toguchini</i>      | 31        | Soil, Isolated in the USSR                            | <a href="#">JF330362</a>                  |
| BGSC 4AF1          | <i>cameroun</i>       | 32        | Soil, Isolated in Denmark                             | <a href="#">JF330363</a>                  |
| BGSC 4AK1          | <i>leesis</i>         | 33        | Toxic to <i>Bombyx mori</i> , Isolated in South Korea | <a href="#">JF330364</a>                  |

---

|           |                        |    |                                               |                          |
|-----------|------------------------|----|-----------------------------------------------|--------------------------|
| BGSC 4AH1 | <i>konkukian</i>       | 34 | Toxic to Bombyx mori, Isolated in South Korea | <a href="#">JF330365</a> |
| BGSC 4AQ1 | <i>seoulensis</i>      | 35 | Soil, Isolated in South Korea                 | <a href="#">JF330389</a> |
| BGSC 4AV1 | <i>Malayensis</i>      | 36 | Isolated in Malaysia                          | <a href="#">JF330366</a> |
| BGSC 4AS1 | <i>oswaldocruzi</i>    | 38 | Food, black pepper powder, Isolated in Brazil | <a href="#">JF330367</a> |
| BGSC 4AY1 | <i>brasiliensis</i>    | 39 | Food, black pepper powder, isolated in Brazil | <a href="#">JF330369</a> |
| BGSC 4BB1 | <i>sooncheon</i>       | 41 | Isolated in South Korea                       | <a href="#">JF330370</a> |
| BGSC 4AR1 | <i>jinghongiensis</i>  | 42 | Soil, Isolated in China                       | <a href="#">JF330371</a> |
| BGSC 4BC1 | <i>guiyangiensis</i>   | 43 | Soil, Isolated in China                       | <a href="#">JF330372</a> |
| BGSC 4AU1 | <i>higo</i>            | 44 | Animal, Insect, Bombyx mori                   | <a href="#">JX162614</a> |
| BGSC 4BG1 | <i>roskildiensis</i>   | 45 | Plant, leaves of ivy, Isolated in Denmark     | <a href="#">JF330373</a> |
| BGSC 4BH1 | <i>chanpaisis</i>      | 46 | Soil, rice field, isolated in Thailand        | <a href="#">JF330374</a> |
| BGSC 4BJ1 | <i>wratislaviensis</i> | 47 | Soil, Isolated in Poland                      | <a href="#">JF330375</a> |
| BGSC 4BK1 | <i>balearica</i>       | 48 | Soil, Isolated in Spain                       | <a href="#">JF330376</a> |
| BGSC 4BL1 | <i>muju</i>            | 49 | Plant, leaves, Isolated in Argentina          | <a href="#">JF330377</a> |
| BGSC 4BM1 | <i>navarrensis</i>     | 50 | Soil                                          | <a href="#">JX162617</a> |
| BGSC 4BN1 | <i>xiaguangiensis</i>  | 51 | Food, beans                                   | <a href="#">JX162620</a> |
| BGSC 4BP1 | <i>kim</i>             | 52 | Soil, sesame field                            | <a href="#">JX162611</a> |
| BGSC 4BQ1 | <i>asturiensis</i>     | 53 | Soil, Isolated in Spain                       | <a href="#">JF330378</a> |
| BGSC 4BR1 | <i>poloniensis</i>     | 54 | Animal, insect                                | <a href="#">JX162613</a> |
| BGSC 4BS1 | <i>palmanyolensis</i>  | 55 | Soil                                          | <a href="#">JX162619</a> |
| BGSC 4BT1 | <i>rongseni</i>        | 56 | Soil, red soil, Isolated in China             | <a href="#">JF330379</a> |
| BGSC 4BU1 | <i>pirenaica</i>       | 57 | Dust, Isolated in Spain                       | <a href="#">JF330380</a> |
| BGSC 4BV1 | <i>argentiniensis</i>  | 58 | Isolated in Argentina                         | <a href="#">JF330381</a> |
| BGSC 4BW1 | <i>iberica</i>         | 59 | Isolated in Spain                             | <a href="#">JF330390</a> |
| BGSC 4BX1 | <i>pingluonsis</i>     | 60 | Sandy soil, Isolated in China                 | <a href="#">JF330395</a> |
| BGSC 4BY1 | <i>sylvestriensis</i>  | 61 | Plant, Scotch pine,                           | <a href="#">JF330382</a> |
| BGSC 4BZ1 | <i>zhaodongensis</i>   | 62 | Soil, black soil, Isolated in China           | <a href="#">JF330383</a> |
| T63001    | <i>azorensis</i>       | 63 | -                                             | <a href="#">JF330384</a> |
| BGSC 4CB1 | <i>pulsiensis</i>      | 64 | Soil, Isolated in Azores                      | <a href="#">JF330385</a> |
| BGSC 4CD1 | <i>graciosensis</i>    | 66 | Soil, Isolated in Azores                      | <a href="#">JF330386</a> |
| BGSC 4CE1 | <i>vazensis</i>        | 67 | Soil, Isolated in Azores                      | <a href="#">JF330387</a> |
| T68001    | <i>thailandensis</i>   | 68 | -                                             | <a href="#">JF330391</a> |
| T69001    | <i>pahagni</i>         | 69 | -                                             | <a href="#">JF330388</a> |
| T70001    | <i>sinensis</i>        | 70 | -                                             | <a href="#">JF330392</a> |
| BGSC 4T1  | <i>wuhanensis</i>      | H0 | Isolated in China                             | <a href="#">JF330396</a> |
| C-15      | -                      | H- | Isolated by our team                          | <a href="#">JF330400</a> |

---

<sup>a</sup>: unknown source

H-: unknown H-antigen
