# Supplementary material
Source: PubMed Central journal article supplement (PMC3675949)
Supplement: AEM.00591-13_zam999104433so3.pdf [file AEM.00591-13_zam999104433so3.pdf]

**Table S3** Distribution of SLH protein genes in genomes of *B. cereus* group strains

| Strain          | SH3_3 | Transglut<br>_core | LRR_RI | Peptidase | Peptidoglycan<br>catabolism | Beta-lactam_<br>resistance | Adhesin | Ca++ binding | Big_5 | NEAT | Rnases | T2SS-T3SS_pil_N | S-layer | other | unknown | total |
|-----------------|-------|--------------------|--------|-----------|-----------------------------|----------------------------|---------|--------------|-------|------|--------|-----------------|---------|-------|---------|-------|
| <b>Ia</b>       |       |                    |        |           |                             |                            |         |              |       |      |        |                 |         |       |         |       |
| Bc_03BB108      | 0     | 1                  | 0      | 0         | 8                           | 2                          | 0       | 1            | 0     | 2    | 0      | 0               | 2       | 1     | 9       | 26    |
| Bt_4AJ1         | 0     | 1                  | 0      | 0         | 8                           | 1                          | 0       | 1            | 0     | 2    | 1      | 0               | 2       | 0     | 10      | 26    |
| Bt_4CC1         | 0     | 1                  | 0      | 1         | 9                           | 2                          | 0       | 0            | 0     | 2    | 0      | 0               | 2       | 0     | 9       | 26    |
| Ba_CNEVA-9066   | 1     | 1                  | 1      | 0         | 8                           | 1                          | 1       | 1            | 0     | 1    | 0      | 0               | 2       | 0     | 8       | 25    |
| Ba_Australia-94 | 1     | 1                  | 1      | 0         | 7                           | 1                          | 1       | 1            | 0     | 1    | 0      | 0               | 2       | 0     | 8       | 24    |
| Ba_Kruger-B     | 1     | 1                  | 1      | 0         | 7                           | 1                          | 1       | 1            | 0     | 1    | 0      | 0               | 2       | 0     | 8       | 24    |
| Ba_Vollum       | 1     | 1                  | 1      | 0         | 7                           | 1                          | 1       | 1            | 0     | 1    | 0      | 0               | 2       | 0     | 8       | 24    |
| Bc_03BB102      | 0     | 1                  | 0      | 1         | 8                           | 3                          | 1       | 1            | 0     | 0    | 0      | 0               | 2       | 0     | 7       | 24    |
| Bc_MSX-A12      | 0     | 1                  | 0      | 0         | 6                           | 1                          | 0       | 1            | 1     | 2    | 1      | 0               | 2       | 0     | 9       | 24    |
| Bt_4BA1         | 0     | 1                  | 0      | 1         | 8                           | 1                          | 0       | 1            | 0     | 2    | 0      | 0               | 2       | 0     | 8       | 24    |
| Ba_USA6153      | 1     | 1                  | 1      | 0         | 7                           | 1                          | 1       | 1            | 0     | 0    | 0      | 0               | 2       | 0     | 8       | 23    |
| Bc_6E1          | 0     | 1                  | 0      | 1         | 8                           | 2                          | 0       | 1            | 0     | 1    | 0      | 0               | 2       | 0     | 7       | 23    |
| Bc_AH820        | 0     | 1                  | 0      | 0         | 7                           | 1                          | 0       | 1            | 0     | 2    | 1      | 0               | 2       | 0     | 8       | 23    |
| Ba_Ames_Ancesor | 0     | 1                  | 0      | 0         | 7                           | 1                          | 1       | 1            | 0     | 1    | 0      | 0               | 2       | 0     | 8       | 22    |
| Bc_CI           | 0     | 1                  | 0      | 0         | 8                           | 2                          | 1       | 1            | 0     | 2    | 0      | 0               | 2       | 0     | 5       | 22    |
| Bc_E33L         | 0     | 1                  | 0      | 0         | 6                           | 2                          | 0       | 1            | 0     | 2    | 0      | 0               | 2       | 0     | 8       | 22    |
| Ba_A1055        | 0     | 1                  | 0      | 0         | 7                           | 1                          | 0       | 1            | 0     | 2    | 0      | 0               | 2       | 0     | 7       | 21    |
| Ba_Ames         | 1     | 1                  | 1      | 0         | 6                           | 1                          | 0       | 1            | 0     | 1    | 0      | 0               | 2       | 0     | 7       | 21    |
| Ba_BF1          | 1     | 1                  | 1      | 0         | 7                           | 1                          | 0       | 1            | 0     | 1    | 0      | 0               | 2       | 0     | 6       | 21    |
| Ba_CDC-684      | 1     | 1                  | 1      | 0         | 6                           | 1                          | 0       | 1            | 0     | 1    | 0      | 0               | 2       | 0     | 7       | 21    |
| Ba_H9401        | 1     | 1                  | 1      | 0         | 6                           | 1                          | 0       | 1            | 0     | 1    | 0      | 0               | 2       | 0     | 7       | 21    |
| Ba_Sterne       | 1     | 1                  | 1      | 0         | 6                           | 1                          | 0       | 1            | 0     | 1    | 0      | 0               | 2       | 0     | 7       | 21    |
| Bc_ISP3191      | 0     | 1                  | 0      | 0         | 7                           | 1                          | 0       | 1            | 0     | 2    | 0      | 0               | 2       | 0     | 7       | 21    |
| Bt_Al_Hakam     | 0     | 1                  | 0      | 0         | 7                           | 2                          | 0       | 1            | 0     | 2    | 0      | 0               | 2       | 0     | 6       | 21    |
| Ba_A0442        | 0     | 1                  | 0      | 0         | 6                           | 1                          | 1       | 1            | 0     | 1    | 0      | 0               | 2       | 0     | 7       | 20    |
| Ba_A0465        | 0     | 1                  | 0      | 0         | 6                           | 1                          | 1       | 1            | 0     | 1    | 0      | 0               | 2       | 0     | 7       | 20    |
| Ba_UR-1         | 1     | 1                  | 1      | 0         | 7                           | 1                          | 0       | 1            | 0     | 1    | 0      | 0               | 2       | 0     | 5       | 20    |
| Bc_95_8201      | 0     | 1                  | 0      | 0         | 7                           | 1                          | 0       | 0            | 0     | 2    | 0      | 1               | 2       | 0     | 6       | 20    |
| Bc_Rock3_42     | 0     | 1                  | 0      | 0         | 6                           | 1                          | 0       | 0            | 0     | 2    | 0      | 0               | 2       | 0     | 8       | 20    |

|                   |   |   |   |   |    |   |   |   |   |   |   |   |   |   |   |    |
|-------------------|---|---|---|---|----|---|---|---|---|---|---|---|---|---|---|----|
| Ba_A0174          | 0 | 1 | 0 | 0 | 5  | 1 | 1 | 1 | 0 | 1 | 0 | 0 | 2 | 0 | 7 | 19 |
| Ba_A0193          | 0 | 1 | 0 | 0 | 6  | 1 | 1 | 1 | 0 | 0 | 0 | 0 | 2 | 0 | 7 | 19 |
| Ba_A0389          | 0 | 1 | 0 | 0 | 5  | 1 | 1 | 1 | 0 | 1 | 0 | 0 | 2 | 0 | 7 | 19 |
| Ba_A0488          | 0 | 1 | 0 | 0 | 6  | 1 | 1 | 1 | 0 | 1 | 0 | 0 | 2 | 0 | 6 | 19 |
| Ba_Tsiankovskii-I | 0 | 1 | 0 | 0 | 6  | 1 | 0 | 1 | 0 | 1 | 0 | 0 | 2 | 0 | 7 | 19 |
| Ba_A0248          | 0 | 1 | 0 | 0 | 5  | 1 | 0 | 1 | 0 | 1 | 0 | 0 | 2 | 0 | 6 | 17 |
| Bc_W              | 0 | 1 | 0 | 0 | 5  | 0 | 0 | 1 | 0 | 2 | 0 | 0 | 2 | 0 | 5 | 16 |
| Bc_G9241          | 0 | 1 | 0 | 1 | 8  | 1 | 1 | 1 | 0 | 1 | 0 | 0 | 2 | 0 | 9 | 25 |
| Bc_AH187          | 0 | 1 | 0 | 2 | 6  | 1 | 0 | 1 | 1 | 2 | 1 | 0 | 2 | 0 | 6 | 23 |
| Bc_IS075          | 0 | 1 | 0 | 0 | 6  | 1 | 0 | 1 | 1 | 2 | 0 | 0 | 2 | 0 | 9 | 23 |
| Bt_4Y1            | 0 | 1 | 0 | 0 | 7  | 2 | 0 | 1 | 0 | 2 | 0 | 0 | 2 | 0 | 8 | 23 |
| Bc_BDRD_ST26      | 0 | 1 | 0 | 2 | 6  | 1 | 0 | 1 | 1 | 2 | 1 | 0 | 2 | 0 | 5 | 22 |
| Bc_Q1             | 0 | 1 | 0 | 2 | 6  | 1 | 0 | 1 | 0 | 2 | 0 | 1 | 2 | 0 | 6 | 22 |
| Bc_4342           | 0 | 1 | 0 | 0 | 7  | 2 | 0 | 0 | 0 | 2 | 0 | 0 | 1 | 0 | 8 | 21 |
| Bc_AND1407        | 0 | 1 | 0 | 0 | 5  | 1 | 0 | 1 | 1 | 2 | 0 | 1 | 2 | 0 | 7 | 21 |
| Bc_H3081.97       | 0 | 1 | 0 | 2 | 6  | 0 | 0 | 1 | 0 | 2 | 0 | 1 | 2 | 0 | 6 | 21 |
| Bc_NC7401         | 0 | 1 | 0 | 0 | 6  | 1 | 0 | 1 | 1 | 2 | 0 | 0 | 2 | 0 | 7 | 21 |
| Bt_YBT-020        | 0 | 1 | 0 | 1 | 7  | 2 | 0 | 1 | 0 | 2 | 0 | 0 | 2 | 0 | 5 | 21 |
| Bc_MSX-D12        | 0 | 1 | 0 | 0 | 6  | 1 | 0 | 1 | 0 | 2 | 0 | 0 | 2 | 0 | 7 | 20 |
| Bc_AH1271         | 0 | 1 | 0 | 0 | 7  | 1 | 0 | 1 | 0 | 2 | 0 | 1 | 2 | 0 | 4 | 19 |
| Bc_m1293          | 0 | 1 | 0 | 1 | 6  | 1 | 0 | 1 | 0 | 2 | 0 | 0 | 2 | 0 | 5 | 19 |
| Bc_VD045          | 0 | 1 | 0 | 0 | 10 | 0 | 0 | 0 | 0 | 1 | 0 | 0 | 0 | 1 | 5 | 19 |
| Bc_FRI-35         | 0 | 1 | 0 | 0 | 6  | 1 | 0 | 1 | 0 | 2 | 0 | 0 | 2 | 0 | 5 | 18 |
| Bc_VD102          | 0 | 1 | 0 | 0 | 6  | 1 | 0 | 1 | 0 | 2 | 0 | 0 | 2 | 0 | 5 | 18 |
| Bc_10987          | 0 | 1 | 0 | 1 | 6  | 0 | 0 | 1 | 0 | 2 | 0 | 0 | 0 | 0 | 5 | 16 |
| Bc_MSX-A1         | 0 | 1 | 0 | 0 | 6  | 0 | 0 | 0 | 0 | 2 | 0 | 0 | 0 | 1 | 3 | 13 |
| <b>Ib</b>         |   |   |   |   |    |   |   |   |   |   |   |   |   |   |   |    |
| Bc_BAG1X1-3       | 0 | 2 | 0 | 0 | 8  | 1 | 0 | 0 | 0 | 2 | 0 | 0 | 1 | 1 | 6 | 21 |
| Bc_BDRD_ST196     | 0 | 1 | 0 | 0 | 7  | 0 | 0 | 0 | 0 | 2 | 0 | 0 | 2 | 1 | 7 | 20 |
| Bc_AH603          | 0 | 1 | 0 | 1 | 6  | 0 | 0 | 1 | 0 | 1 | 0 | 0 | 0 | 1 | 8 | 19 |
| Bc_HuA2-4         | 0 | 1 | 0 | 0 | 7  | 0 | 0 | 1 | 0 | 2 | 0 | 0 | 2 | 0 | 6 | 19 |
| Bc_AH1272         | 0 | 1 | 0 | 2 | 5  | 0 | 0 | 0 | 0 | 2 | 0 | 0 | 2 | 0 | 6 | 18 |
| Bc_HuA2-1         | 1 | 1 | 0 | 0 | 6  | 0 | 0 | 1 | 0 | 2 | 0 | 0 | 1 | 0 | 5 | 18 |

|              |   |   |   |   |   |   |   |   |   |   |   |   |   |   |   |    |
|--------------|---|---|---|---|---|---|---|---|---|---|---|---|---|---|---|----|
| Bc_VD078     | 0 | 1 | 0 | 0 | 5 | 0 | 0 | 1 | 0 | 2 | 0 | 0 | 2 | 0 | 7 | 18 |
| Bc_AH621     | 0 | 1 | 0 | 0 | 5 | 1 | 0 | 0 | 0 | 2 | 0 | 0 | 1 | 1 | 5 | 16 |
| Bc_AH1273    | 0 | 1 | 1 | 1 | 3 | 0 | 0 | 0 | 0 | 1 | 0 | 0 | 2 | 0 | 6 | 15 |
| Bc_CER057    | 0 | 1 | 0 | 0 | 5 | 0 | 0 | 1 | 0 | 1 | 0 | 1 | 2 | 0 | 5 | 15 |
| Bc_CER074    | 0 | 1 | 0 | 0 | 5 | 0 | 0 | 1 | 0 | 1 | 0 | 1 | 2 | 0 | 5 | 15 |
| Bc_VD048     | 0 | 1 | 0 | 0 | 5 | 1 | 0 | 0 | 0 | 2 | 0 | 0 | 1 | 0 | 5 | 15 |
| Bc_391_98    | 0 | 1 | 0 | 1 | 6 | 0 | 0 | 1 | 0 | 0 | 0 | 1 | 2 | 0 | 2 | 14 |
| Bc_BAG3X2-1  | 0 | 1 | 0 | 1 | 5 | 0 | 0 | 0 | 0 | 2 | 0 | 0 | 0 | 0 | 5 | 14 |
| Bc_VD107     | 0 | 1 | 0 | 1 | 3 | 0 | 0 | 0 | 0 | 0 | 0 | 0 | 0 | 0 | 4 | 9  |
| <b>IIa</b>   |   |   |   |   |   |   |   |   |   |   |   |   |   |   |   |    |
| Bt_9727      | 0 | 1 | 0 | 0 | 5 | 1 | 0 | 1 | 0 | 2 | 0 | 0 | 0 | 0 | 9 | 19 |
| Bc_BAG6X1-1  | 0 | 1 | 0 | 0 | 6 | 0 | 0 | 1 | 0 | 1 | 0 | 0 | 0 | 0 | 6 | 17 |
| Bc_BAG2X1-2  | 0 | 1 | 0 | 0 | 6 | 0 | 0 | 1 | 0 | 1 | 0 | 0 | 0 | 0 | 7 | 16 |
| Bc_MM3       | 0 | 1 | 0 | 0 | 5 | 0 | 0 | 1 | 0 | 1 | 0 | 0 | 0 | 0 | 7 | 15 |
| Bc_R309803   | 0 | 1 | 0 | 1 | 4 | 0 | 0 | 1 | 0 | 1 | 0 | 0 | 0 | 0 | 6 | 14 |
| <b>IIb</b>   |   |   |   |   |   |   |   |   |   |   |   |   |   |   |   |    |
| Bc_VD156     | 0 | 1 | 0 | 0 | 7 | 0 | 0 | 0 | 0 | 1 | 0 | 0 | 0 | 2 | 6 | 17 |
| Bc_VD166     | 0 | 1 | 0 | 0 | 8 | 0 | 0 | 0 | 0 | 1 | 0 | 0 | 0 | 0 | 6 | 16 |
| Bc_VD169     | 0 | 1 | 0 | 0 | 8 | 0 | 0 | 0 | 0 | 1 | 0 | 0 | 0 | 0 | 6 | 16 |
| Bc_AH1134    | 0 | 1 | 0 | 0 | 8 | 0 | 0 | 0 | 0 | 1 | 0 | 0 | 0 | 0 | 5 | 15 |
| Bc_BAG6X1-2  | 0 | 1 | 0 | 0 | 4 | 0 | 0 | 0 | 1 | 2 | 0 | 0 | 1 | 0 | 6 | 15 |
| Bc_VD022     | 0 | 1 | 0 | 0 | 8 | 0 | 0 | 0 | 0 | 1 | 0 | 0 | 0 | 0 | 5 | 15 |
| Bc_BAG4X12-1 | 0 | 1 | 0 | 0 | 7 | 2 | 0 | 0 | 0 | 1 | 0 | 0 | 0 | 0 | 3 | 14 |
| Bc_VD014     | 0 | 1 | 0 | 0 | 6 | 0 | 0 | 0 | 0 | 1 | 0 | 0 | 0 | 0 | 5 | 14 |
| Bt_IBL_200   | 0 | 1 | 0 | 0 | 8 | 0 | 0 | 0 | 0 | 1 | 0 | 0 | 0 | 0 | 4 | 14 |
| Bt_10792     | 0 | 1 | 0 | 0 | 5 | 0 | 0 | 0 | 0 | 1 | 0 | 0 | 0 | 0 | 6 | 13 |
| Bt_4BD1      | 0 | 1 | 0 | 0 | 6 | 1 | 0 | 0 | 0 | 1 | 0 | 0 | 0 | 0 | 4 | 13 |
| Bt_CT-43     | 0 | 1 | 0 | 0 | 5 | 0 | 0 | 0 | 0 | 1 | 0 | 0 | 0 | 0 | 5 | 13 |
| Bc_10876     | 0 | 1 | 0 | 0 | 6 | 0 | 0 | 0 | 0 | 1 | 0 | 0 | 0 | 1 | 3 | 12 |
| Bc_BAG3O-2   | 0 | 1 | 0 | 0 | 7 | 0 | 0 | 0 | 0 | 1 | 0 | 0 | 0 | 0 | 3 | 12 |
| Bc_BAG4O-1   | 0 | 1 | 0 | 0 | 7 | 0 | 0 | 0 | 0 | 1 | 0 | 0 | 0 | 0 | 3 | 12 |
| Bc_F65185    | 0 | 1 | 0 | 0 | 5 | 0 | 0 | 0 | 0 | 1 | 1 | 0 | 0 | 0 | 4 | 12 |
| Bc_HuB1-1    | 0 | 1 | 0 | 0 | 7 | 0 | 0 | 0 | 0 | 1 | 1 | 0 | 0 | 0 | 2 | 12 |

|               |   |   |   |   |   |   |   |   |   |   |   |   |   |   |   |    |
|---------------|---|---|---|---|---|---|---|---|---|---|---|---|---|---|---|----|
| Bc_VD142      | 0 | 1 | 0 | 0 | 6 | 0 | 0 | 1 | 0 | 2 | 0 | 0 | 0 | 0 | 2 | 12 |
| Bt_HD-771     | 0 | 1 | 0 | 0 | 7 | 0 | 0 | 0 | 0 | 1 | 0 | 0 | 0 | 0 | 3 | 12 |
| Bt_IBL_4222   | 0 | 1 | 0 | 0 | 8 | 0 | 0 | 0 | 0 | 1 | 0 | 0 | 0 | 0 | 2 | 12 |
| Bt_T01001     | 0 | 1 | 0 | 0 | 5 | 0 | 0 | 0 | 0 | 1 | 0 | 0 | 0 | 0 | 5 | 12 |
| Bc_BAG1X1-2   | 0 | 1 | 0 | 0 | 6 | 0 | 0 | 0 | 0 | 1 | 1 | 0 | 0 | 0 | 2 | 11 |
| Bc_BAG3X2-2   | 0 | 1 | 0 | 0 | 6 | 0 | 0 | 0 | 0 | 1 | 0 | 0 | 0 | 0 | 3 | 11 |
| Bc_G9842      | 0 | 1 | 0 | 0 | 6 | 0 | 0 | 0 | 0 | 1 | 0 | 0 | 0 | 0 | 3 | 11 |
| Bc_HD73       | 0 | 1 | 0 | 0 | 5 | 0 | 0 | 0 | 0 | 1 | 0 | 0 | 0 | 0 | 4 | 11 |
| Bc_Rock1_15   | 0 | 1 | 0 | 0 | 6 | 0 | 0 | 0 | 0 | 1 | 0 | 0 | 0 | 0 | 3 | 11 |
| Bt_T03a001    | 0 | 1 | 0 | 0 | 5 | 0 | 0 | 0 | 0 | 1 | 0 | 0 | 0 | 0 | 4 | 11 |
| Bc_14579      | 0 | 1 | 0 | 0 | 6 | 0 | 0 | 0 | 0 | 1 | 0 | 0 | 0 | 0 | 2 | 10 |
| Bc_172560W    | 0 | 1 | 0 | 0 | 6 | 0 | 0 | 0 | 0 | 1 | 0 | 0 | 0 | 0 | 2 | 10 |
| Bc_AH676      | 1 | 1 | 0 | 0 | 4 | 0 | 0 | 0 | 0 | 1 | 0 | 0 | 0 | 0 | 3 | 10 |
| Bc_B4264      | 0 | 1 | 0 | 0 | 6 | 0 | 0 | 0 | 0 | 1 | 0 | 0 | 0 | 0 | 2 | 10 |
| Bc_BDRD_ST24  | 0 | 1 | 0 | 0 | 5 | 1 | 0 | 0 | 0 | 1 | 0 | 0 | 0 | 0 | 2 | 10 |
| Bc_BDRD-Cer4  | 0 | 1 | 0 | 0 | 6 | 0 | 0 | 0 | 0 | 1 | 0 | 0 | 0 | 0 | 2 | 10 |
| Bc_VD200      | 0 | 1 | 0 | 0 | 6 | 0 | 0 | 0 | 0 | 1 | 0 | 0 | 0 | 0 | 2 | 10 |
| Bt_BMB171     | 0 | 1 | 0 | 0 | 5 | 1 | 0 | 0 | 0 | 1 | 0 | 0 | 0 | 0 | 2 | 10 |
| Bt_Bt407      | 0 | 1 | 0 | 0 | 5 | 0 | 0 | 0 | 0 | 1 | 0 | 0 | 0 | 0 | 3 | 10 |
| Bt_HD-789     | 0 | 1 | 0 | 0 | 6 | 0 | 0 | 0 | 0 | 1 | 0 | 0 | 0 | 0 | 2 | 10 |
| Bc_m1550      | 0 | 1 | 0 | 0 | 5 | 0 | 0 | 0 | 0 | 1 | 0 | 0 | 0 | 0 | 2 | 9  |
| Bc_VD154      | 0 | 1 | 0 | 0 | 5 | 0 | 0 | 0 | 0 | 1 | 0 | 0 | 0 | 0 | 2 | 9  |
| Bt_35646      | 0 | 1 | 0 | 0 | 6 | 0 | 0 | 0 | 0 | 1 | 0 | 0 | 0 | 0 | 1 | 9  |
| Bt_4AW1       | 0 | 0 | 0 | 0 | 3 | 0 | 0 | 1 | 0 | 2 | 0 | 0 | 0 | 0 | 3 | 9  |
| Bt_T13001     | 0 | 1 | 0 | 0 | 5 | 1 | 0 | 0 | 0 | 0 | 0 | 0 | 0 | 0 | 2 | 9  |
| Bc_BAG5X1-1   | 0 | 1 | 0 | 0 | 4 | 0 | 0 | 0 | 0 | 1 | 0 | 0 | 0 | 0 | 2 | 8  |
| Bc_HuA4-10    | 0 | 1 | 0 | 0 | 4 | 0 | 0 | 0 | 0 | 1 | 0 | 0 | 0 | 0 | 2 | 8  |
| Bc_NVH0597_99 | 0 | 0 | 0 | 1 | 2 | 0 | 0 | 1 | 0 | 1 | 0 | 0 | 0 | 0 | 3 | 8  |
| Bt_T04001     | 0 | 1 | 0 | 0 | 4 | 0 | 0 | 0 | 0 | 0 | 0 | 0 | 0 | 0 | 3 | 8  |

**SH3\_3 domains:** are protein interaction domains that bind proline-rich ligands with moderate affinity and selectivity, preferentially to PxxP motifs.

**Transglut\_core:** Transglutaminase-like superfamily. This family includes animal transglutaminases and other bacterial proteins of unknown function

**LRR\_RI:** Leucine-rich repeats (LRRs), ribonuclease inhibitor (RI)-like subfamily.

**Peptidase:** including C39\_like , M60-like and M23-like Peptidases

**Peptidoglycan catabolism:** including PGRP, Peptidoglycan recognition proteins (PGRPs) are pattern recognition receptors that bind, and in certain cases, hydrolyze peptidoglycans (PGNs) of bacterial cell walls. MurNAc-LAA, N-acetylmuramoyl-L-alanine amidase or MurNAc-LAA (also known as peptidoglycan aminohydrolase, NAMLA amidase, NAMLAA, Amidase 3, and peptidoglycan amidase; EC 3.5.1.28) is an autolysin that hydrolyzes the amide bond between N-acetylmuramoyl and L-amino acids in certain cell wall glycopeptides. Glucosaminidase: This family includes Mannosyl-glycoprotein endo-beta-N-acetylglucosaminidase EC:3.2.1.96, as well as the flageller protein J, which has been shown to hydrolyse peptidoglycan.

**Beta-lactam\_resistance:** including Beta-lactamase, This family appears to be distantly related to pfam00905 and PF00768 D-alanyl-D-alanine carboxypeptidase. Lactamase\_B: Metal-dependent hydrolases of the beta-lactamase superfamily III

**Adhesin:** BslA,

**Ca<sup>++</sup> binding:** Excalibur calcium-binding domain, Extracellular Ca<sup>2+</sup>-dependent nuclease YokF from *Bacillus subtilis* and several other surface-exposed proteins from diverse bacteria are encoded in the genomes in two paralogous forms that differ by a ~45 amino acid fragment, which comprises a novel conserved domain.

**Big\_5:** Bacterial Ig-like domain. Uncharacterized protein, homolog of Cu resistance protein CopC

**NEAT:** NEAr Transport domain, a component of cell surface proteins. NEAr Transporter (NEAT) domain; used by pathogenic bacteria to to scavenge heme-iron from host hemoproteins. The NEAT domain is a component of cell surface proteins (iron regulated surface determinants, or Isd, such as IsdA and IsdC) in various gram-positive bacteria, and may be arranged in tandem repeats.

**RNases:** microbial\_RNases. Ribonucleases (RNAses) cleave phosphodiester bonds in RNA and are essential for both non-specific RNA degradation and for numerous forms of RNA processing. The alignment contains fungal RNases (U2, T1, F1, Th, Pb, N1, and Ms) and bacterial RNases (barnase, binase, RNase Sa) , the majority of which are guanyl specific and fungal ribotoxins.

**T2SS-T3SS\_pil\_N:** Pilus formation protein N terminal region

**S-layer protein:** Sap and EA1 proteins

**Other:** existing in less than 5 strains
